# Supplementary material for: Metformin Affects Olaparib Sensitivity through Induction of Apoptosis in Epithelial Ovarian Cancer Cell Lines
Source: MDPI journal article supplement (doi:10.3390/ijms221910557), 2021-09-29
Supplement: s1 [file s1]

**Table S1.** Comparison of the viability and the apoptotic, necrotic and total cells death in SKOV-3 and OV-90 cell lines after 24 h treatment with metformin (20 mM), olaparib (20  $\mu$ M) and their combination (20 mM + 20  $\mu$ M).

| OV-90  |                          |                          |                                |              |                 |                                  |              |                 |
|--------|--------------------------|--------------------------|--------------------------------|--------------|-----------------|----------------------------------|--------------|-----------------|
|        | MTT                      | TUNEL                    | Hoechst 33258/Propidium iodide |              |                 | Acridine orange/Ethidium bromide |              |                 |
|        | Viability [% of control] | TUNEL positive cells [%] | Apoptosis [%]                  | Necrosis [%] | Total death [%] | Apoptosis [%]                    | Necrosis [%] | Total death [%] |
| C      | 100                      | 0,9                      | —                              | 1,8          | 1,8             | —                                | 1,5          | 1,5             |
| O      | 94,93                    | 8,2                      | 12,4                           | 4,3          | 16,7            | 9                                | 5,3          | 14,3            |
| M      | 91,4                     | 7,9                      | 8,5                            | 5,9          | 14,4            | 6,7                              | 5,2          | 11,9            |
| O+M    | 82,87                    | 17,4                     | 21,7                           | 14,2         | 35,9            | 19,1                             | 4,9          | 24              |
| SKOV-3 |                          |                          |                                |              |                 |                                  |              |                 |
| C      | 100                      | 1,2                      | —                              | 2,3          | 2,3             | 0,7                              | 2,8          | 3,5             |
| O      | 85,87                    | 22,4                     | 12,7                           | 3,9          | 16,6            | 12,7                             | 6,4          | 19,1            |
| M      | 85,75                    | 17,9                     | 15,8                           | 9,6          | 25,4            | 17                               | 9            | 26              |
| O+M    | 55,87                    | 29,7                     | 43,5                           | 19,1         | 62,6            | 34,8                             | 17,1         | 51,9            |

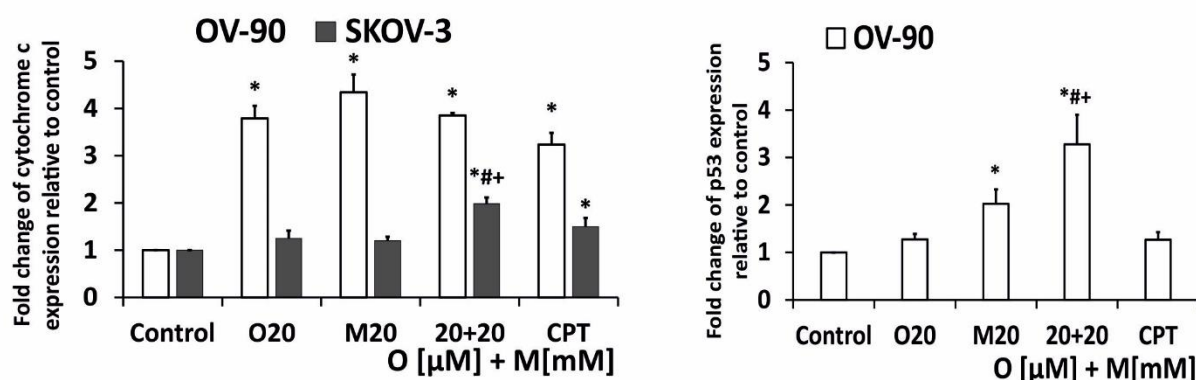

**Figure S1.** Fold changes of cytochrome c or p53 expression in the OV-90 and SKOV-3 cells treated with O (20  $\mu$ M), M (20 mM), O (20  $\mu$ M) + M (20 mM) or CPT (5  $\mu$ M) for 24 h as measured by western blotting. Data represent the mean  $\pm$  SD of three independent experiments. \*  $P < 0.05$  for olaparib, metformin, or a combination of both drugs vs. control cells; #  $P < 0.05$  for olaparib vs. combination (O+M); +  $P < 0.05$  for metformin vs. combination (O+M).

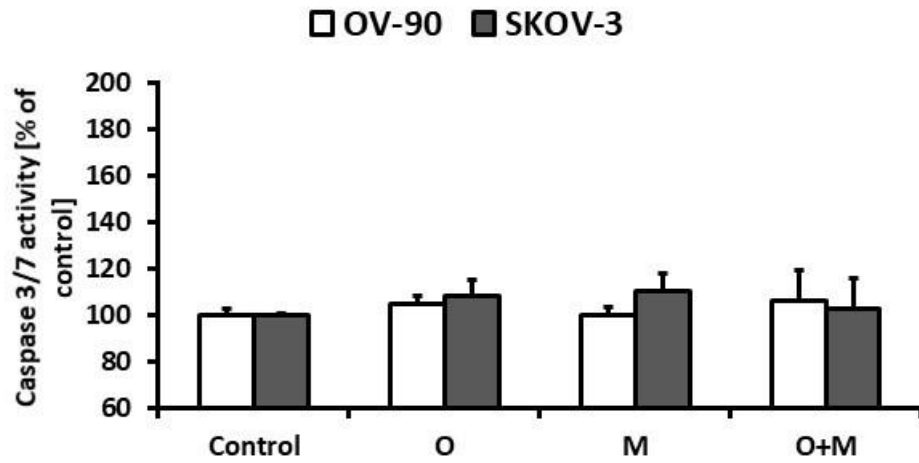

**Figure S2.** Changes in caspase 3/7 activity in SKOV-3 and OV-90 cells treated with metformin or olaparib and their combination for 24 h in the presence of the caspase inhibitor, Z-FA-FMK. The results are presented as a percentage activity of caspase 3/7, where the fluorescence value of the untreated control was taken as 100%.
